# Supplementary material for: Research into the Optimal Regulation of the Groundwater Table and Quality in the Southern Plain of Beijing Using Geographic Information Systems Data and Machine Learning Algorithms
Source: MDPI journal article supplement (doi:10.3390/ijgi11100501), 2022-09-26
Supplement: s1 [file s1]

**Table S1** Errors between the calculated NO<sub>3</sub>-N concentration values and the monitored NO<sub>3</sub>-N concentration values for the three machine learning algorithms during the validation period

| Machine learning algorithm | Mean absolute error | Root mean square error | Correlation coefficient | Nash efficiency coefficient |
|----------------------------|---------------------|------------------------|-------------------------|-----------------------------|
| LSTM                       | 0.05                | 0.91                   | 0.98                    | 0.98                        |
| RF                         | 1.45                | 3.59                   | 0.93                    | 0.62                        |
| SVR                        | 0.09                | 2.98                   | 0.94                    | 0.80                        |

**Table S2** Optimal allocation of water resources under wet year in 2025

| Hydrological year type | Groundwater exploitation regime         | Water source type           | Domestic water (10 <sup>4</sup> m <sup>3</sup> ) | Industrial water (10 <sup>4</sup> m <sup>3</sup> ) | Agricultural water (10 <sup>4</sup> m <sup>3</sup> ) | Ecological water (10 <sup>4</sup> m <sup>3</sup> ) | Total water consumption (10 <sup>4</sup> m <sup>3</sup> ) | Available water (10 <sup>4</sup> m <sup>3</sup> ) |
|------------------------|-----------------------------------------|-----------------------------|--------------------------------------------------|----------------------------------------------------|------------------------------------------------------|----------------------------------------------------|-----------------------------------------------------------|---------------------------------------------------|
| Wet year               | Current groundwater exploitation regime | Surface water               | 0                                                | 0                                                  | 0                                                    | 0                                                  | 0                                                         | 1572.00                                           |
|                        |                                         | Groundwater                 | 10128.41                                         | 1021.48                                            | 10021.23                                             | 284.97                                             | 21456.09                                                  | 22450.66                                          |
|                        |                                         | Reclaimed water             | 8.85                                             | 0.00                                               | 0                                                    | 14728.71                                           | 14737.56                                                  | 15987.00                                          |
|                        |                                         | Transferred water           | 2546.02                                          | 53.98                                              | 0                                                    | 0                                                  | 2600.00                                                   | 2600.00                                           |
|                        |                                         | Total water consumption     | 12683.28                                         | 1075.46                                            | 10021.23                                             | 15013.68                                           | 38793.65                                                  | 42609.66                                          |
|                        |                                         | Water demand                | 12683.28                                         | 1075.46                                            | 10021.23                                             | 15013.68                                           | 38793.65                                                  |                                                   |
|                        |                                         | Water supply guarantee rate | 100%                                             | 100%                                               | 100%                                                 | 100%                                               | 100%                                                      |                                                   |
|                        | Groundwater exploitation regime 1       | Surface water               | 0                                                | 0                                                  | 1572                                                 | 0                                                  | 1572                                                      | 1572.00                                           |
|                        |                                         | Groundwater                 | 7965.79                                          | 215.09                                             | 8449.23                                              | 0                                                  | 16630.11                                                  | 21469.20                                          |
|                        |                                         | Reclaimed water             | 2117.49                                          | 860.37                                             | 0                                                    | 13009.14                                           | 15987                                                     | 15987.00                                          |
|                        |                                         | Transferred water           | 2600                                             | 0                                                  | 0                                                    | 0                                                  | 2600                                                      | 2600.00                                           |
|                        |                                         | Total water consumption     | 12683.28                                         | 1075.46                                            | 10021.23                                             | 13009.14                                           | 36789.11                                                  | 41628.20                                          |
|                        |                                         | Water demand                | 12683.28                                         | 1075.46                                            | 10021.23                                             | 15013.68                                           | 38793.65                                                  |                                                   |
|                        |                                         | Water supply guarantee rate | 100%                                             | 100%                                               | 100%                                                 | 86.65%                                             | 94.83%                                                    |                                                   |
|                        | Groundwater exploitation regime 2       | Surface water               | 0                                                | 0                                                  | 1572                                                 | 0                                                  | 1572                                                      | 1572.00                                           |
|                        |                                         | Groundwater                 | 7965.79                                          | 215.09                                             | 8449.23                                              | 0                                                  | 16630.11                                                  | 17651.93                                          |
|                        |                                         | Reclaimed water             | 2117.49                                          | 860.37                                             | 0                                                    | 13009.14                                           | 15987                                                     | 15987.00                                          |
|                        |                                         | Transferred water           | 2600                                             | 0                                                  | 0                                                    | 0                                                  | 2600                                                      | 2600.00                                           |

|              |                             |          |         |          |          |          |          |
|--------------|-----------------------------|----------|---------|----------|----------|----------|----------|
|              | Total water consumption     | 12683.28 | 1075.46 | 10021.23 | 13009.14 | 36789.11 | 37810.93 |
|              | Water demand                | 12683.28 | 1075.46 | 10021.23 | 15013.68 | 38793.65 |          |
|              | Water supply guarantee rate | 100%     | 100%    | 100%     | 86.65%   | 94.83%   |          |
|              | Surface water               | 0        | 0       | 1572     | 0        | 1572     | 1572     |
|              | Groundwater                 | 7965.79  | 215.09  | 8449.23  | 0        | 16630.11 | 16805.84 |
| Groundwater  | Reclaimed water             | 2117.49  | 860.37  | 0        | 13009.14 | 15987.00 | 15987.00 |
| exploitation | Transferred water           | 2600     | 0       | 0        | 0        | 2600.00  | 2600.00  |
| regime 3     | Total water consumption     | 12683.28 | 1075.46 | 10021.23 | 13009.14 | 36789.11 | 36964.84 |
|              | Water demand                | 12683.28 | 1075.46 | 10021.23 | 15013.68 | 38793.65 |          |
|              | Water supply guarantee rate | 100%     | 100%    | 100%     | 86.65%   | 94.83%   |          |

**Table S3** Optimal allocation of water resources under normal year in 2025

| Hydrological<br>year type | Groundwater<br>exploitation<br>regime | Water source type           | Domestic<br>water<br>(10 <sup>4</sup> m <sup>3</sup> ) | Industrial<br>water<br>(10 <sup>4</sup> m <sup>3</sup> ) | Agricultural<br>water<br>(10 <sup>4</sup> m <sup>3</sup> ) | Ecological<br>water<br>(10 <sup>4</sup> m <sup>3</sup> ) | Total water<br>consumption<br>(10 <sup>4</sup> m <sup>3</sup> ) | Available<br>water<br>(10 <sup>4</sup> m <sup>3</sup> ) |
|---------------------------|---------------------------------------|-----------------------------|--------------------------------------------------------|----------------------------------------------------------|------------------------------------------------------------|----------------------------------------------------------|-----------------------------------------------------------------|---------------------------------------------------------|
|                           |                                       | Surface water               | 0                                                      | 0                                                        | 0                                                          | 0                                                        | 0                                                               | 1572.00                                                 |
|                           |                                       | Groundwater                 | 10128.41                                               | 1021.48                                                  | 10021.23                                                   | 284.97                                                   | 21456.09                                                        | 18086.54                                                |
|                           | Current                               | Reclaimed water             | 8.85                                                   | 0                                                        | 0                                                          | 14728.71                                                 | 14737.56                                                        | 15987.00                                                |
|                           | groundwater                           | Transferred water           | 2546.02                                                | 53.98                                                    | 0                                                          | 0                                                        | 2600.00                                                         | 2600.00                                                 |
|                           | exploitation                          | Total water consumption     | 12683.28                                               | 1075.46                                                  | 10021.23                                                   | 15013.68                                                 | 38793.65                                                        | 38245.54                                                |
|                           | regime                                | Water demand                | 12683.28                                               | 1075.46                                                  | 10021.23                                                   | 15013.68                                                 | 38793.65                                                        |                                                         |
|                           |                                       | Water supply guarantee rate | 100%                                                   | 100%                                                     | 100%                                                       | 100%                                                     | 100%                                                            |                                                         |
|                           |                                       | Surface water               | 0                                                      | 0                                                        | 1572.00                                                    | 0                                                        | 1572.00                                                         | 1572.00                                                 |
|                           |                                       | Groundwater                 | 7965.79                                                | 215.09                                                   | 8364.71                                                    | 0                                                        | 16545.59                                                        | 16545.59                                                |
| Normal year               | Groundwater                           | Reclaimed water             | 2117.49                                                | 860.37                                                   | 0                                                          | 13009.14                                                 | 15987.00                                                        | 15987                                                   |
|                           | exploitation                          | Transferred water           | 2600                                                   | 0                                                        | 0                                                          | 0                                                        | 2600.00                                                         | 2600.00                                                 |
|                           | regime 1                              | Total water consumption     | 12683.28                                               | 1075.46                                                  | 9936.71                                                    | 13009.14                                                 | 36704.59                                                        | 36964.84                                                |
|                           |                                       | Water demand                | 12683.28                                               | 1075.46                                                  | 10021.23                                                   | 15013.68                                                 | 38793.65                                                        |                                                         |
|                           |                                       | Water supply guarantee rate | 100%                                                   | 100%                                                     | 99.16%                                                     | 86.65%                                                   | 94.61%                                                          |                                                         |
|                           | Groundwater                           | Surface water               | 0                                                      | 0                                                        | 1572.00                                                    | 0                                                        | 1572.00                                                         | 1572.00                                                 |
|                           | exploitation                          | Groundwater                 | 7133.65                                                | 198.87                                                   | 5885.04                                                    | 0                                                        | 13217.56                                                        | 13217.56                                                |
|                           | regime 2                              | Reclaimed water             | 2949.63                                                | 876.59                                                   | 890.03                                                     | 11270.75                                                 | 15987.00                                                        | 15987.00                                                |

|              |                             |          |         |          |          |          |          |
|--------------|-----------------------------|----------|---------|----------|----------|----------|----------|
|              | Transferred water           | 2600     | 0       | 0        | /        | 2600     | 2600.00  |
|              | Total water consumption     | 12683.28 | 1075.46 | 8347.07  | 11270.75 | 33376.56 | 33376.56 |
|              | Water demand                | 12683.28 | 1075.46 | 10021.23 | 15013.68 | 38793.65 |          |
|              | Water supply guarantee rate | 100%     | 100%    | 83.29%   | 75.07%   | 86.04%   |          |
|              | Surface water               | 0        | 0       | 1572.00  | 0        | 1572.00  | 1572.00  |
|              | Groundwater                 | 7896.65  | 205.32  | 4406.37  | 0        | 12508.34 | 12508.34 |
| Groundwater  | Reclaimed water             | 2186.63  | 870.14  | 2387.95  | 10542.28 | 15987    | 15987.00 |
| exploitation | Transferred water           | 2600     | 0       | 0        | 0        | 2600.00  | 2600.00  |
| regime 3     | Total water consumption     | 12683.28 | 1075.46 | 8366.32  | 10542.28 | 32667.34 | 32667.34 |
|              | Water demand                | 12683.28 | 1075.46 | 10021.23 | 15013.68 | 38793.65 |          |
|              | Water supply guarantee rate | 100%     | 100%    | 83.49%   | 70.22%   | 84.21%   |          |

**Table S4** Optimal allocation of water resources under dry year in 2025

| Hydrological<br>year type | Groundwater<br>exploitation<br>regime            | Water source type           | Domestic<br>water<br>(10 <sup>4</sup> m <sup>3</sup> ) | Industrial<br>water<br>(10 <sup>4</sup> m <sup>3</sup> ) | Agricultural<br>water<br>(10 <sup>4</sup> m <sup>3</sup> ) | Ecological<br>water<br>(10 <sup>4</sup> m <sup>3</sup> ) | Total water<br>consumption<br>(10 <sup>4</sup> m <sup>3</sup> ) | Available<br>water<br>(10 <sup>4</sup> m <sup>3</sup> ) |
|---------------------------|--------------------------------------------------|-----------------------------|--------------------------------------------------------|----------------------------------------------------------|------------------------------------------------------------|----------------------------------------------------------|-----------------------------------------------------------------|---------------------------------------------------------|
| Dry year                  | Current<br>groundwater<br>exploitation<br>regime | Surface water               | 0                                                      | 0                                                        | 0                                                          | 0                                                        | 0                                                               | 1572.00                                                 |
|                           |                                                  | Groundwater                 | 10128.41                                               | 1021.48                                                  | 11603.53                                                   | 284.97                                                   | 23038.39                                                        | 14931.44                                                |
|                           |                                                  | Reclaimed water             | 8.85                                                   | 0                                                        | 0                                                          | 14728.71                                                 | 14737.56                                                        | 15987.00                                                |
|                           |                                                  | Transferred water           | 2546.02                                                | 53.98                                                    | 0                                                          | 0.00                                                     | 2600.00                                                         | 2600.00                                                 |
|                           |                                                  | Total water consumption     | 12683.28                                               | 1075.46                                                  | 11603.53                                                   | 15013.68                                                 | 40375.95                                                        | 35090.44                                                |
|                           |                                                  | Water demand                | 12683.28                                               | 1075.46                                                  | 11603.53                                                   | 15013.68                                                 | 40375.95                                                        |                                                         |
|                           |                                                  | Water supply guarantee rate | 100%                                                   | 100%                                                     | 100%                                                       | 100%                                                     | 100.00%                                                         |                                                         |
|                           | Groundwater<br>exploitation<br>regime 1          | Surface water               | 0                                                      | 0                                                        | 1001.00                                                    | 0                                                        | 1001.00                                                         | 1001.00                                                 |
|                           |                                                  | Groundwater                 | 7906.81                                                | 74.06                                                    | 4400.89                                                    | 0                                                        | 12381.76                                                        | 12381.76                                                |
|                           |                                                  | Reclaimed water             | 2117.49                                                | 990.68                                                   | 2364.36                                                    | 10514.47                                                 | 15987.00                                                        | 15987.00                                                |
|                           |                                                  | Transferred water           | 2600                                                   | 0                                                        | 0                                                          | 0                                                        | 2600.00                                                         | 2600.00                                                 |
|                           |                                                  | Total water consumption     | 12624.3                                                | 1064.74                                                  | 7766.25                                                    | 10514.47                                                 | 31969.76                                                        | 31969.76                                                |
|                           |                                                  | Water demand                | 12683.28                                               | 1075.46                                                  | 10021.23                                                   | 15013.68                                                 | 38793.65                                                        |                                                         |
|                           |                                                  | Water supply guarantee rate | 99.53%                                                 | 99.00%                                                   | 77.50%                                                     | 70.03%                                                   | 82.41%                                                          |                                                         |
|                           |                                                  | Surface water               | 0                                                      | 0                                                        | 1001.00                                                    | 0                                                        | 1001.00                                                         | 1001.00                                                 |
|                           |                                                  | Groundwater                 | 7838.16                                                | 129.5                                                    | 1926.38                                                    | 0                                                        | 9894.04                                                         | 9894.04                                                 |

|                                         |                             |          |         |          |          |          |          |
|-----------------------------------------|-----------------------------|----------|---------|----------|----------|----------|----------|
| Groundwater<br>exploitation<br>regime 2 | Reclaimed water             | 2117.49  | 882.05  | 3302.58  | 9684.88  | 15987.00 | 15987.00 |
|                                         | Transferred water           | 2600     | 0       | 0        | 0        | 2600.00  | 2600.00  |
|                                         | Total water consumption     | 12555.65 | 1011.55 | 6229.96  | 9684.88  | 29482.04 | 29482.04 |
|                                         | Water demand                | 12683.28 | 1075.46 | 10021.23 | 15013.68 | 38793.65 |          |
|                                         | Water supply guarantee rate | 98.99%   | 94.06%  | 62.17%   | 64.51%   | 76.00%   |          |
| Groundwater<br>exploitation<br>regime 3 | Surface water               | 0        | 0       | 1001.00  | 0        | 1001.00  | 1001.00  |
|                                         | Groundwater                 | 6952.22  | 71.1    | 2296.29  | 0        | 9319.61  | 9319.61  |
|                                         | Reclaimed water             | 2522.77  | 989.66  | 2957.19  | 9517.38  | 15987.00 | 15987.00 |
|                                         | Transferred water           | 2600     | 0       | 0        | 0        | 2600.00  | 2600.00  |
|                                         | Total water consumption     | 12074.99 | 1060.76 | 6254.48  | 9517.38  | 28907.61 | 28907.61 |
|                                         | Water demand                | 12683.28 | 1075.46 | 10021.23 | 15013.68 | 38793.65 |          |
|                                         | Water supply guarantee rate | 95.20%   | 98.63%  | 62.41%   | 63.39%   | 74.52%   |          |
